# Supplementary material
Source: Springer Nature journal article supplement (https://www.springermedizin.de/resource/supplementary/13024_2012_364_MOESM1_ESM.pdf/9643830)

**Additional File 1. Generation of mThy1-LRRK2 (G2019S) transgenic mice model.**

**(A)** Diagrammatic representation of the transgene in the mThy1 cassette and PCR analysis showing the corresponding fragments. **(B)** Real time PCR analysis showing the levels of mRNA expression of the human LRRK2 in line 29, bearing the G2019S mutation. **(C)** Western blot analysis in membrane and cytosolic fractions showing increased expression of the LRRK2 protein in the transgenic mouse compared to non-tg littermates. **(D)** Immunocytochemical analysis for LRRK2 displaying the patterns of expression of hLRRK2 in the control and transgenic mice. Bar represents 10  $\mu$ m.

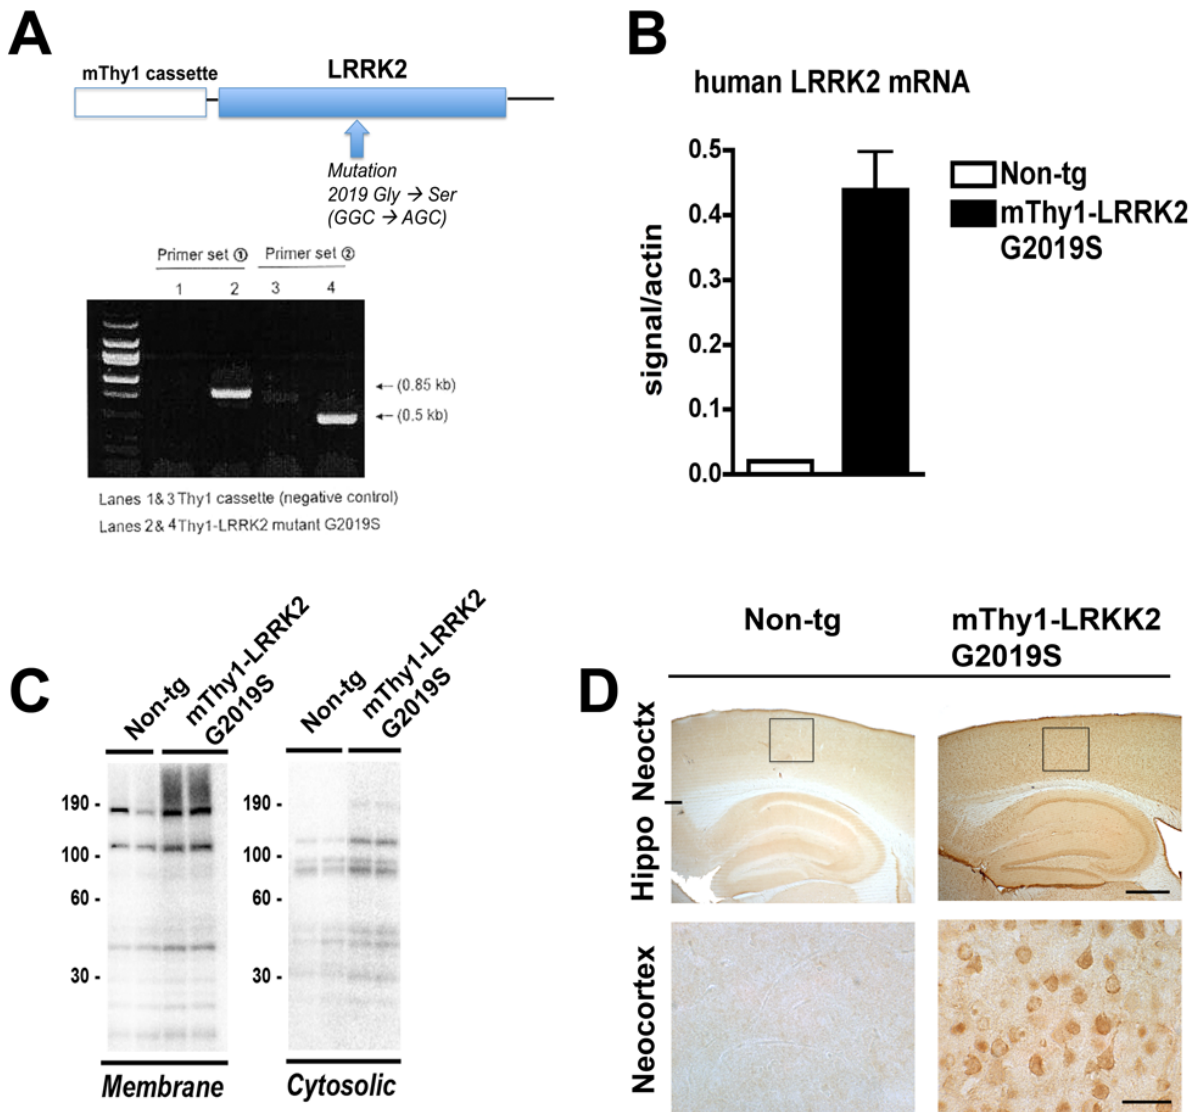

Supplement: MOESM1 [file 9643830]
